# Supplementary material for: Experimental and theoretical study of bidirectional photoswitching behavior of 5,5′-diphenylhydantoin Schiff bases: synthesis, crystal structure and kinetic approaches
Source: Royal Society of Chemistry journal article supplement (doi:10.1039/d0nj03301d), 2020-01-01
Supplement: d0nj03301d1.pdf [file d0nj03301d1.pdf]

## Electronic Supplementary Material (ESI)

### Experimental and theoretical study of bidirectional photoswitching behavior of the 5,5'-diphenylhydantoin Schiff bases: synthesis, crystal structure and kinetics approaches

Petar Todorov,<sup>a\*</sup> Stela Georgieva,<sup>b</sup> Petia Peneva,<sup>a,c</sup> Rusi Rusew,<sup>c</sup>  
Boris Shivachev,<sup>c</sup> Anton Georgiev<sup>a,d\*</sup>

<sup>a</sup>*Department of Organic Chemistry, University of Chemical Technology and Metallurgy, 1756 Sofia, Bulgaria, e-mail: [pepi\\_37@abv.bg](mailto:pepi_37@abv.bg)*

<sup>b</sup>*Department of Analytical Chemistry, University of Chemical Technology and Metallurgy, 1756 Sofia, Bulgaria*

<sup>c</sup>*Institute of Mineralogy and Crystallography, Bulgarian Academy of Sciences, Sofia 1113, Bulgaria*

<sup>d</sup>*Department of Optical Metrology and Holography, Institute of Optical Materials and Technologies, Bulgarian Academy of Science, 1113 Sofia, Bulgaria, e-mail: [antonchem@abv.bg](mailto:antonchem@abv.bg)*

<sup>a\*</sup>*Corresponding author: Petar T. Todorov, <sup>a</sup>Department of Organic Chemistry, University of Chemical Technology and Metallurgy, 1756 Sofia, Bulgaria, e-mail: [pepi\\_37@abv.bg](mailto:pepi_37@abv.bg)*

<sup>d\*</sup>*Corresponding author: Anton Georgiev, <sup>d</sup>Department of Optical Metrology and Holography, Institute of Optical Materials and Technologies, Bulgarian Academy of Science, 1113 Sofia, Bulgaria., e-mail: [antonchem@abv.bg](mailto:antonchem@abv.bg)*

## NMR spectra

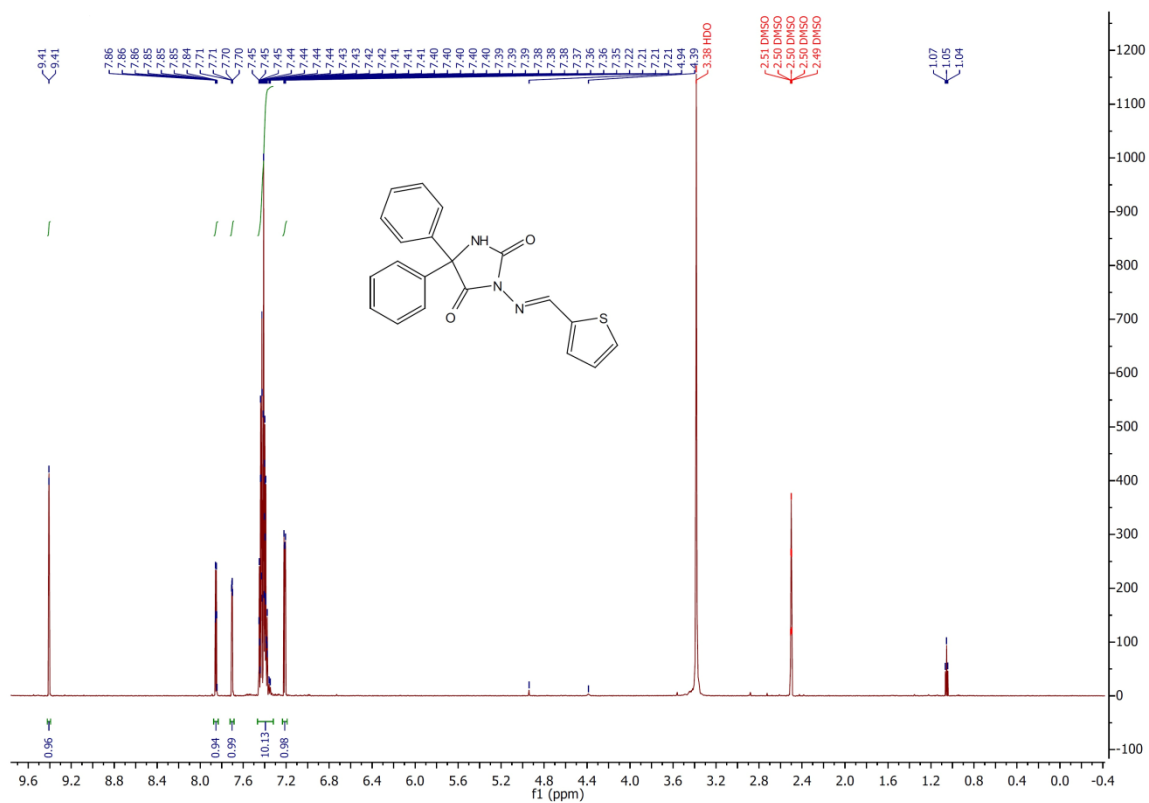

Figure S1. <sup>1</sup>H-NMR spectrum of SB1

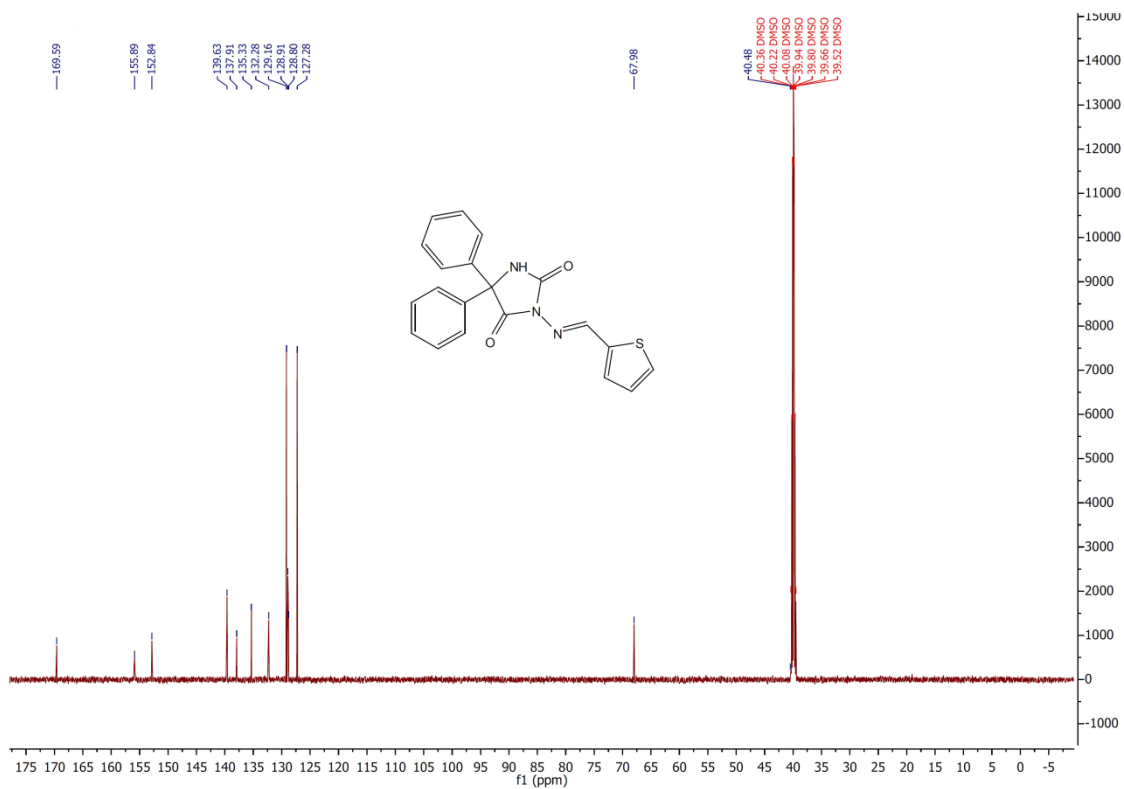

Figure S2. <sup>13</sup>C-NMR spectrum of SB1

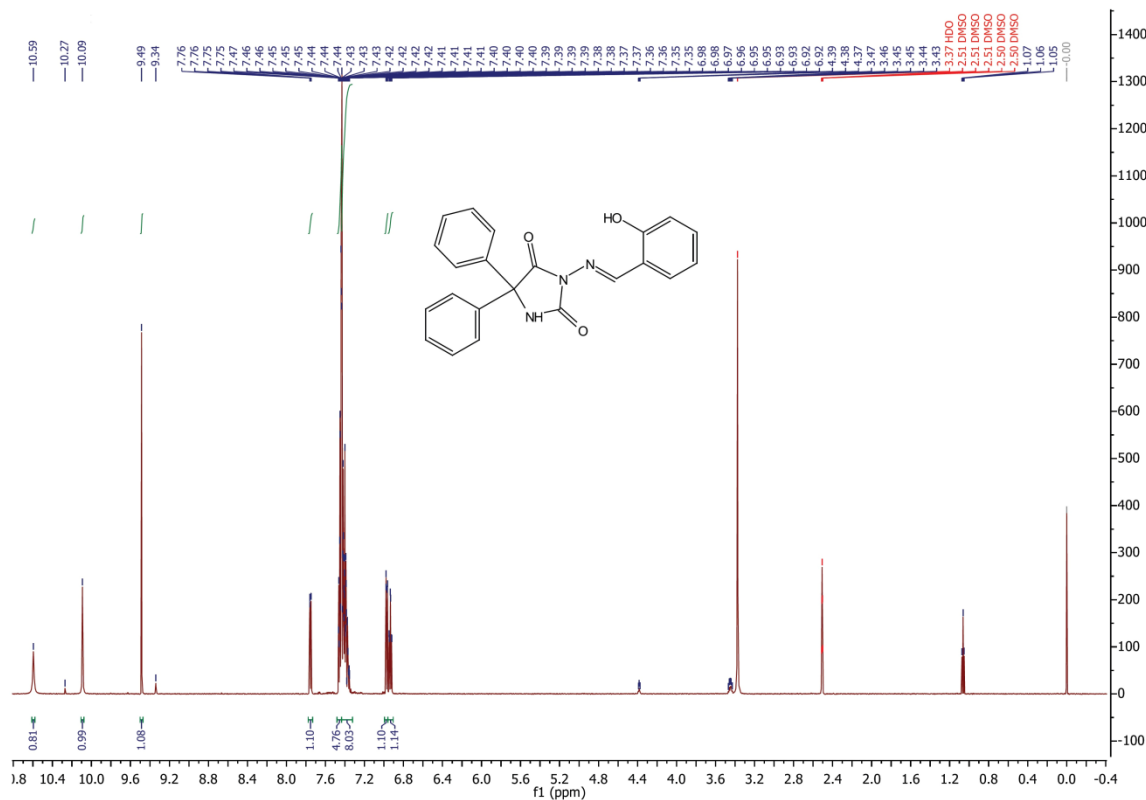

Figure S3. <sup>1</sup>H-NMR spectrum of SB2

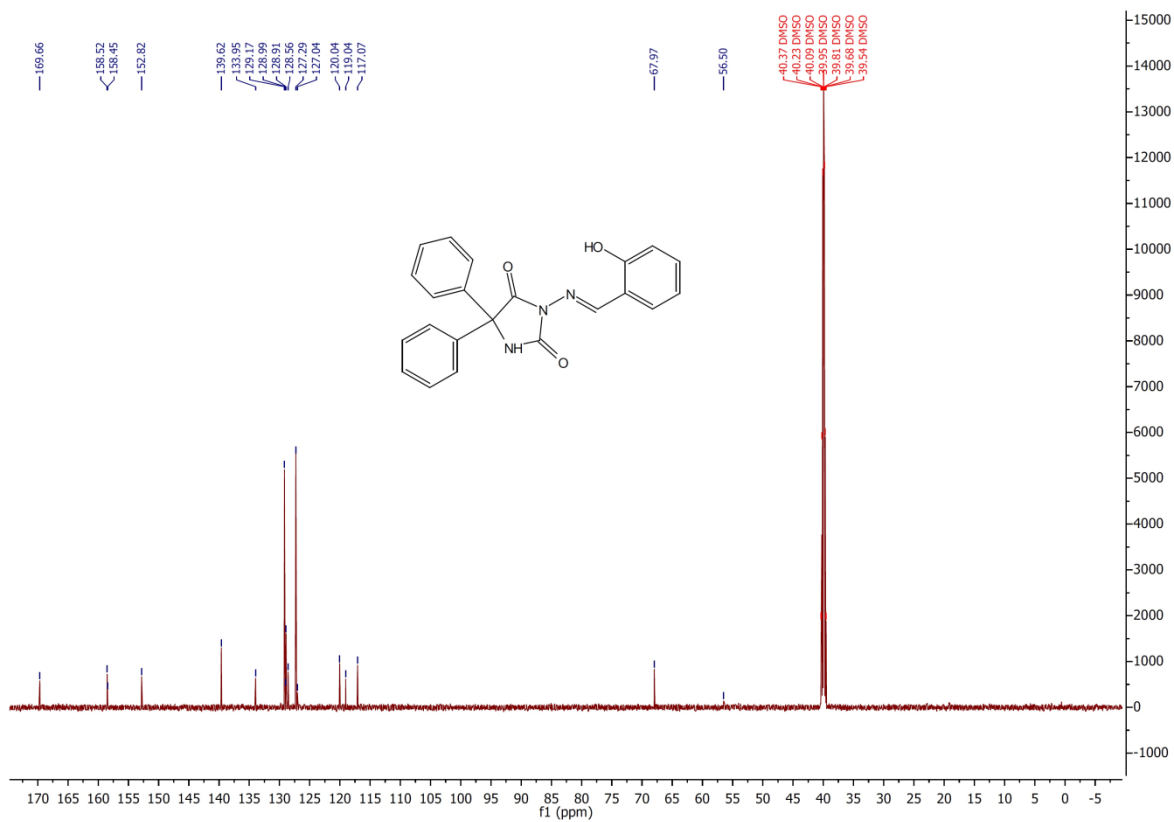

Figure S4. <sup>13</sup>C-NMR spectrum of SB2

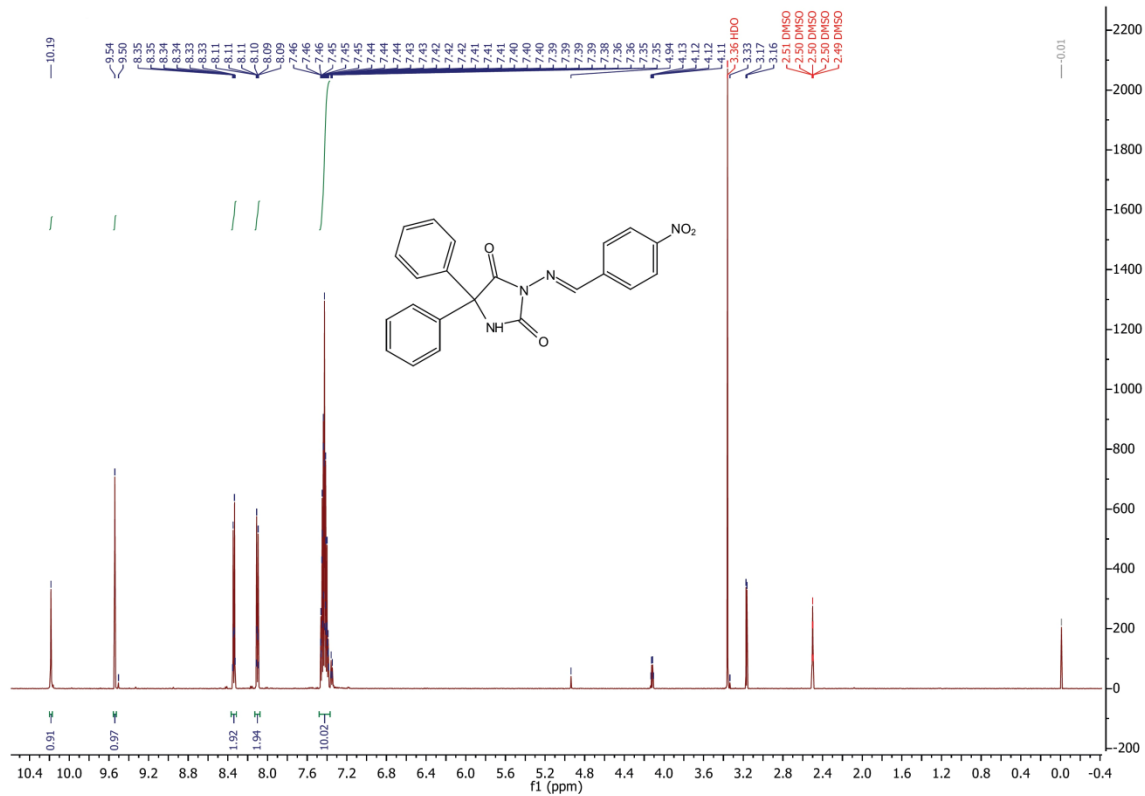

Figure S5. <sup>1</sup>H-NMR spectrum of SB3

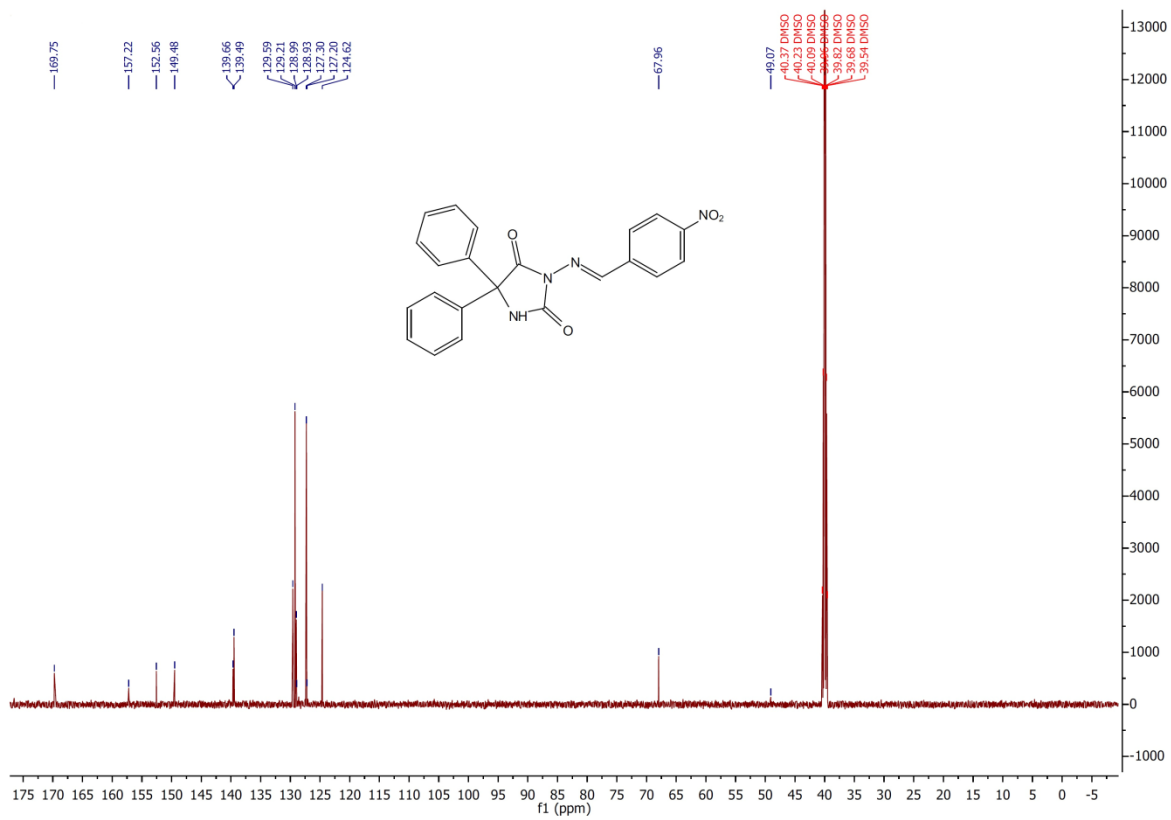

Figure S6. <sup>13</sup>C-NMR spectrum of SB3

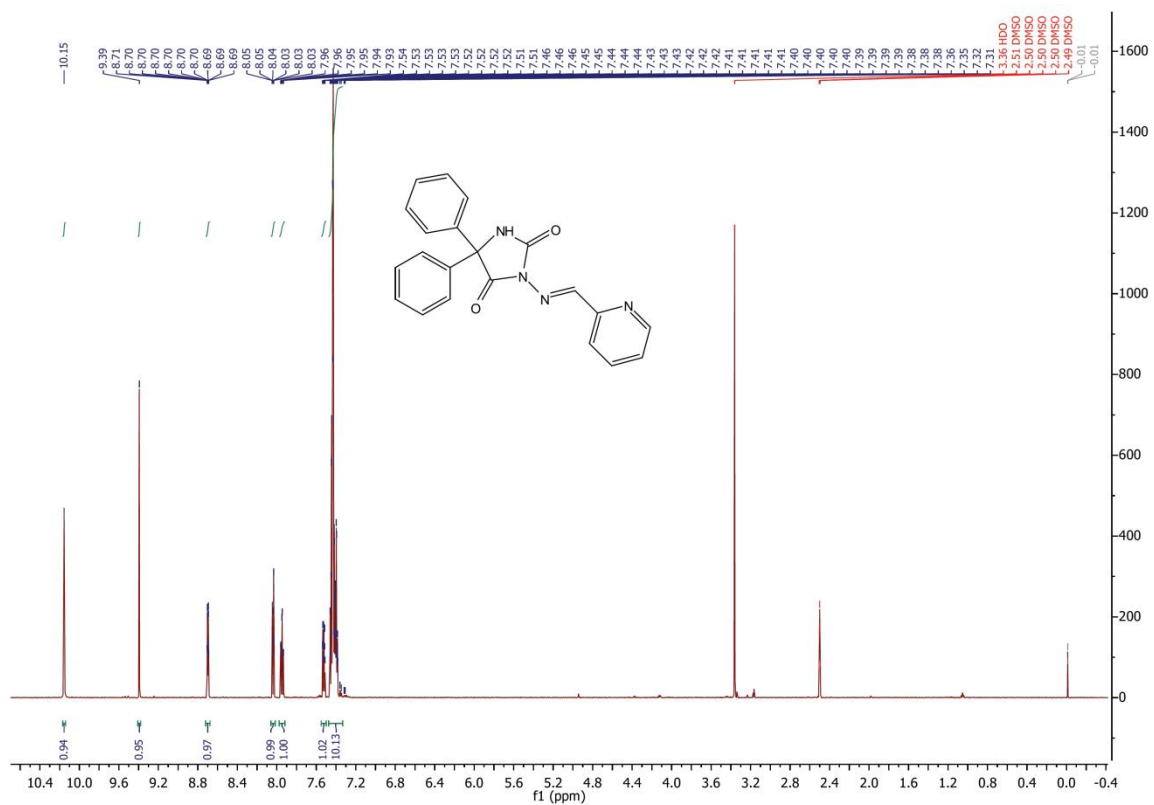

Figure S7.  $^1\text{H-NMR}$  spectrum of SB4

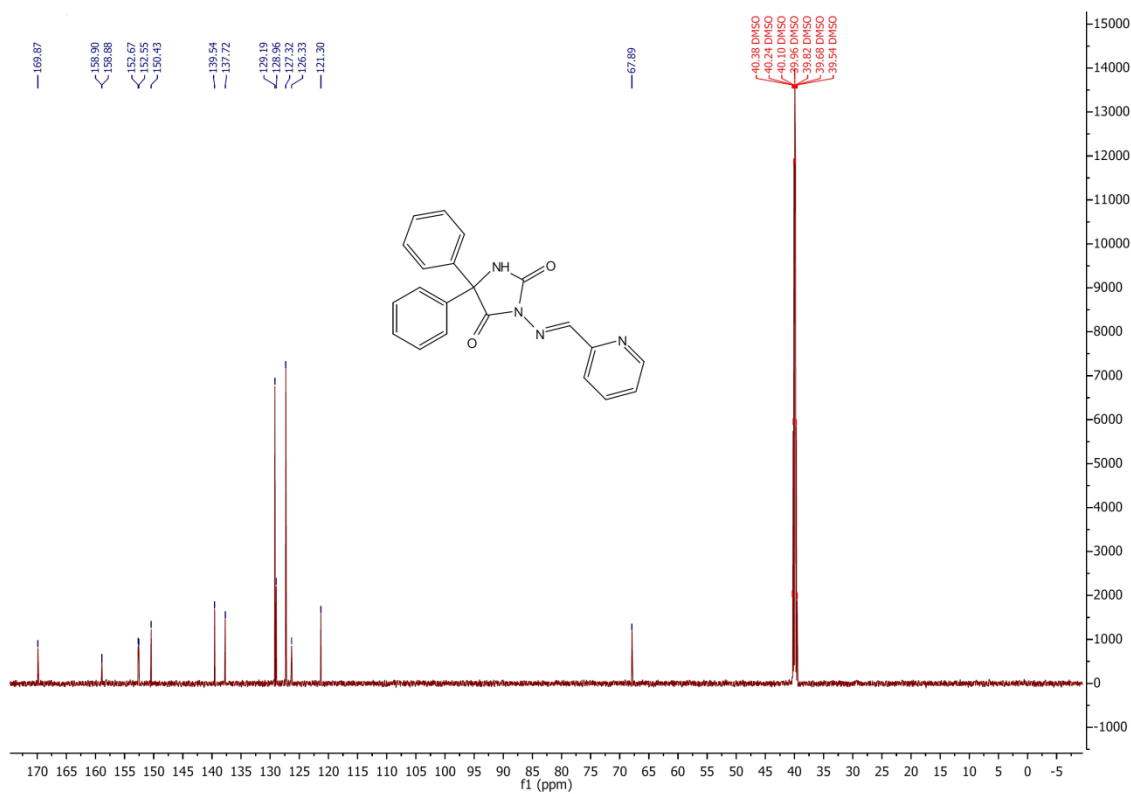

Figure S8.  $^{13}\text{C-NMR}$  spectrum of SB4



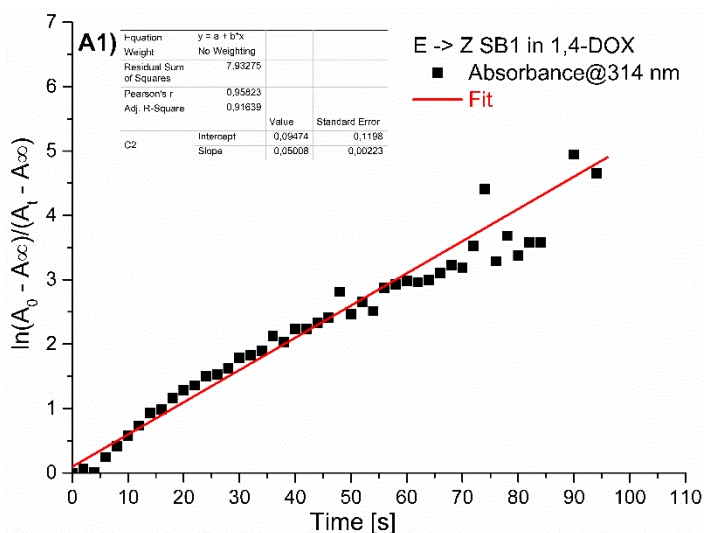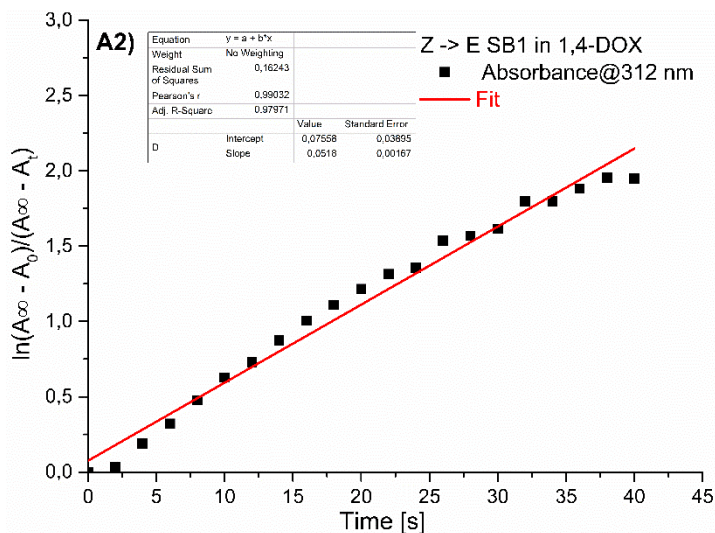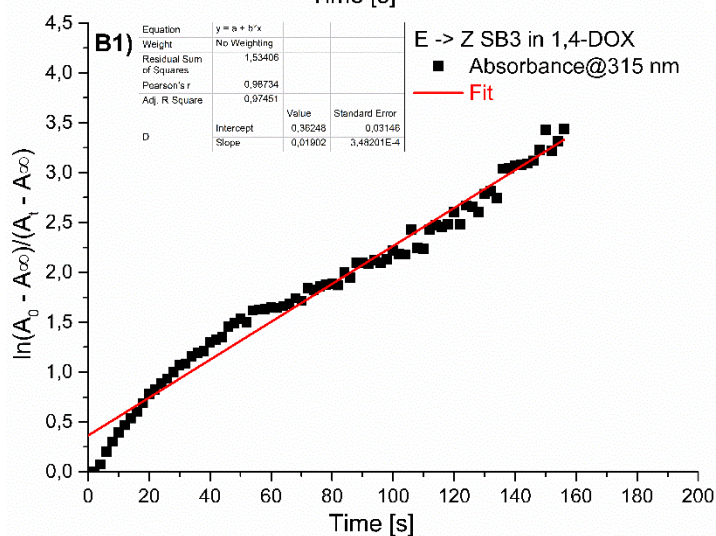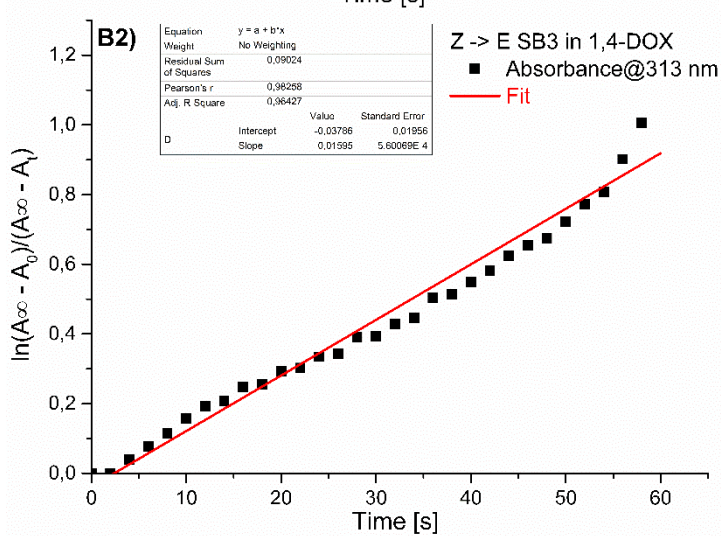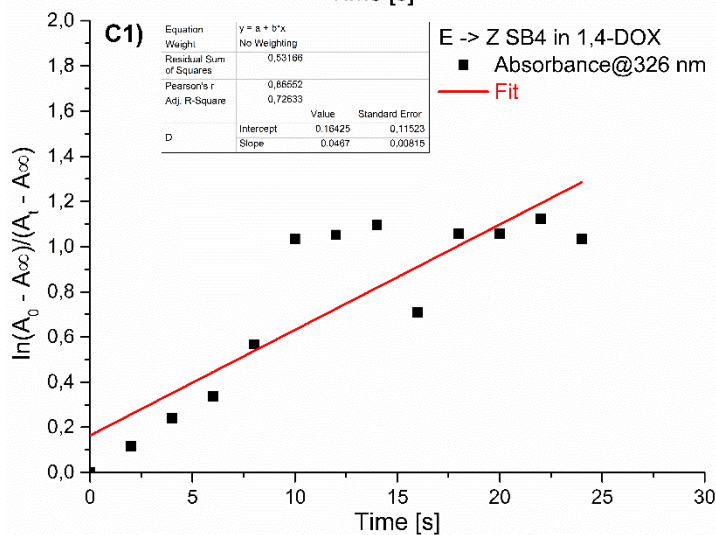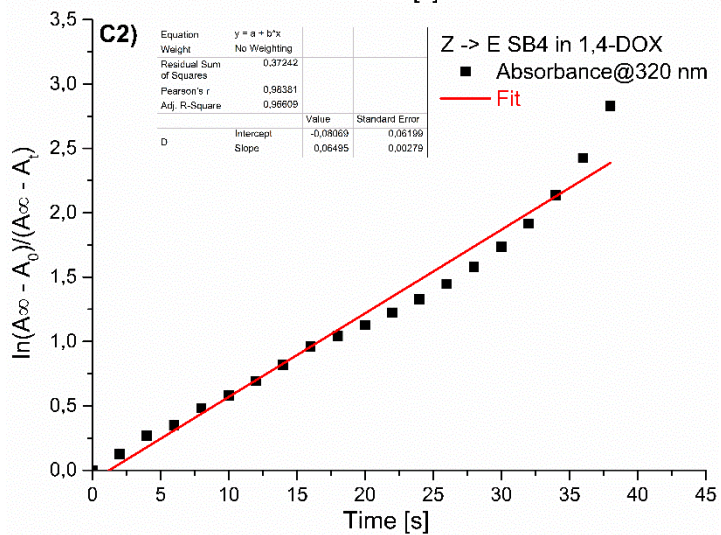

**Figure S9.** First-order plots for the E/Z photoisomerization and enol/keto tautomerization of SB's in 1,4-DOX as well as Z/E and keto/enol back relaxation in room temperature.

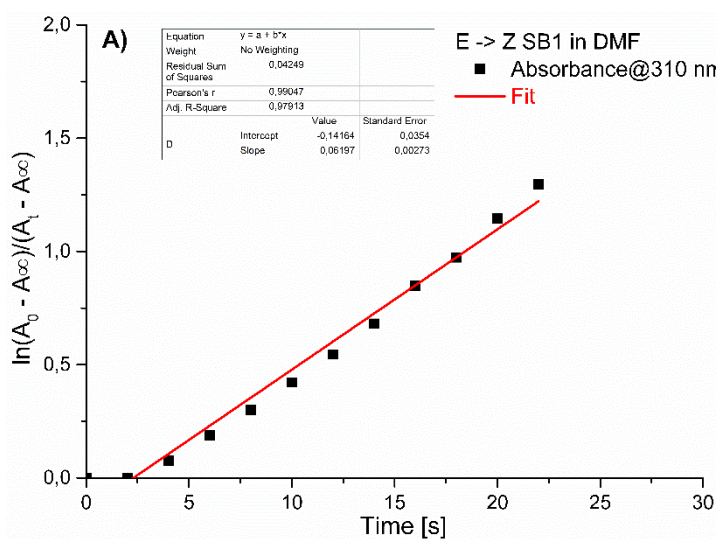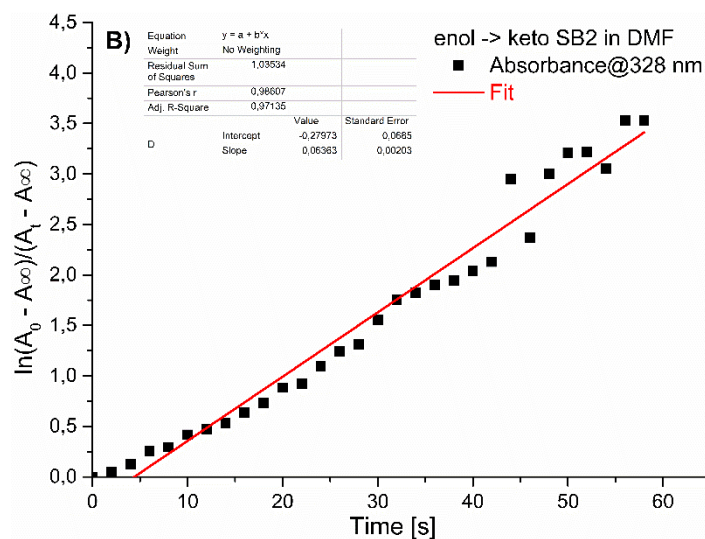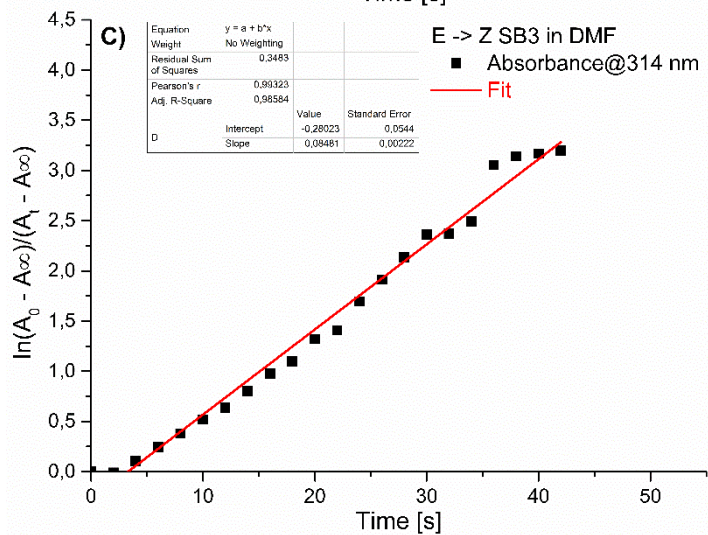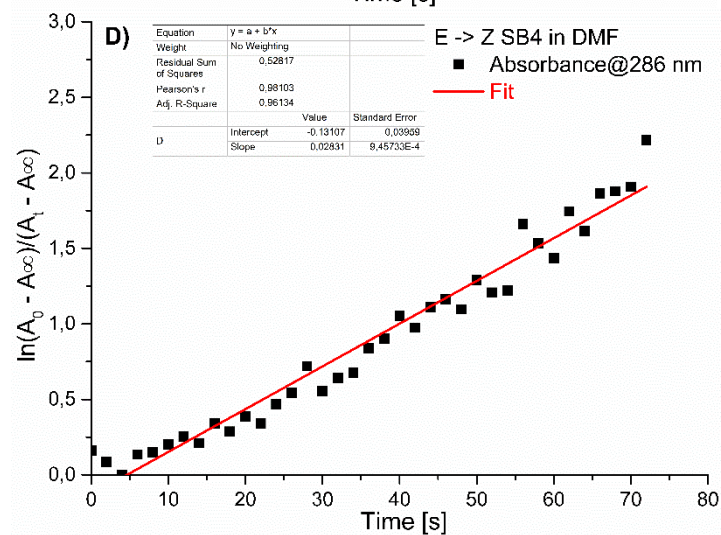

**Figure S10.** First-order plots for the *E/Z* photoisomerization and enol/keto tautomerization of SB's in DMF.

## Electrochemistry

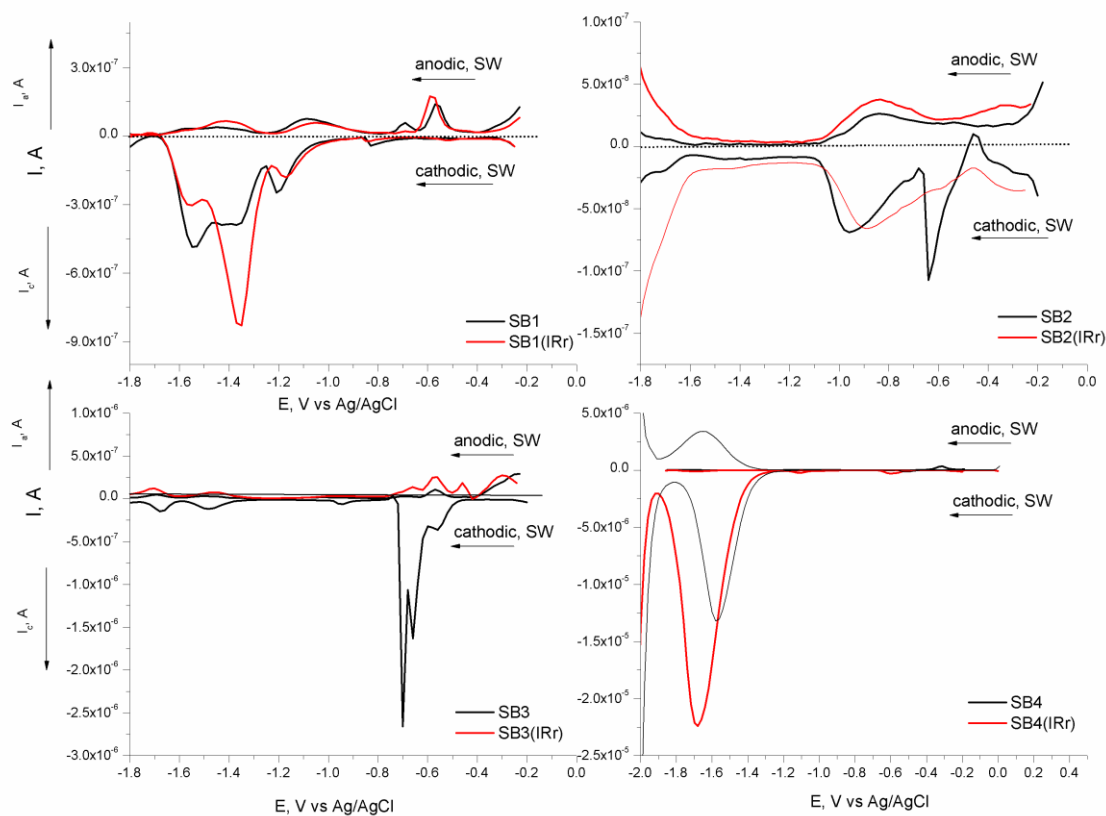

**Figure S11.** SWVs of 3-amino-5,5'-diphenylhydantoin Schiff bases before and after UV illumination with  $\lambda = 350$  nm at pH 12.21 (LiOH/LiCl) and concentrations: **SB1**:  $2.41 \times 10^{-4}$ ; **SB2**:  $1.66 \times 10^{-4}$ ; **SB3**:  $8.85 \times 10^{-5}$ ; **SB4**:  $9.74 \times 10^{-5}$  mol L<sup>-1</sup> and frequency: 50Hz.



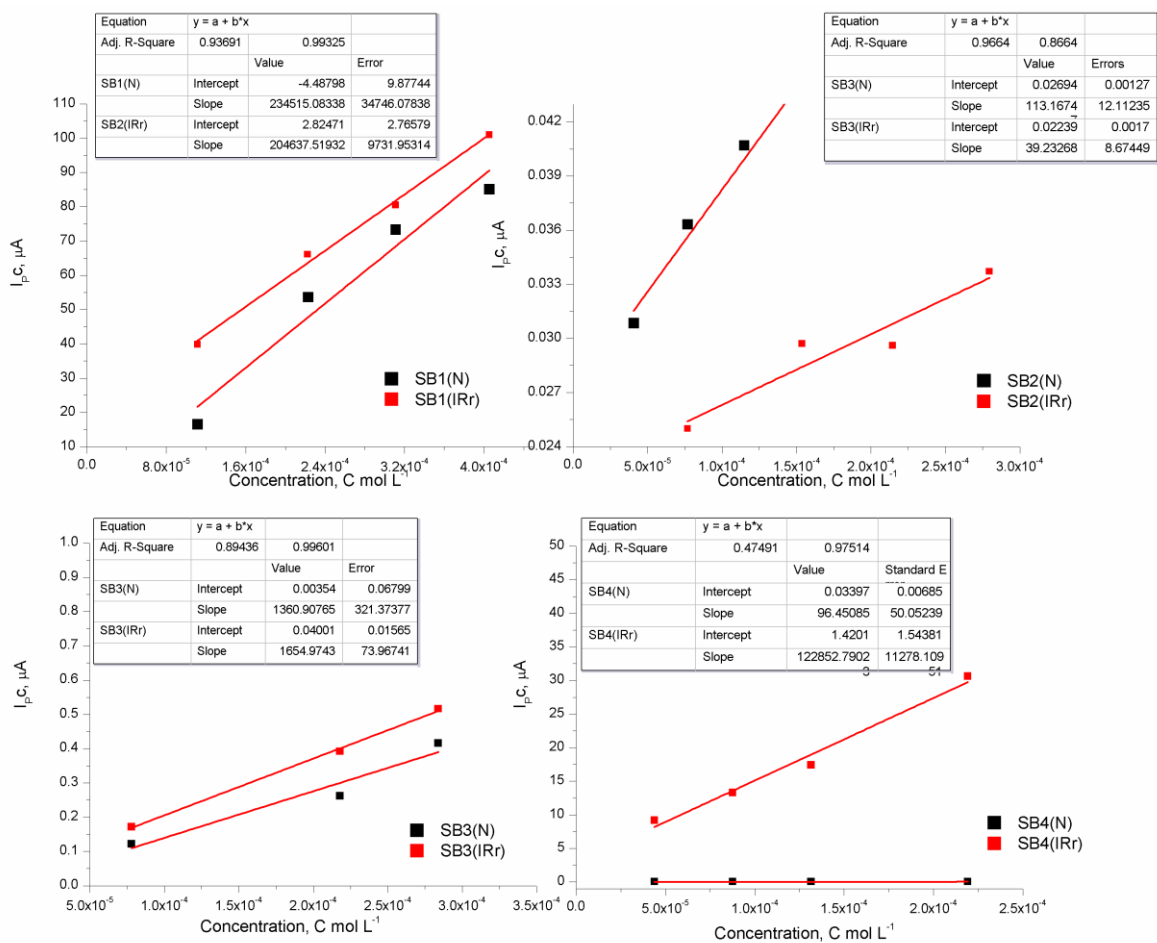

**Figure S12.** Plot of  $I_{pc}$  ( $\mu\text{A}$ ) vs. different concentrations ( $\text{mol L}^{-1}$ ) of 3-amino-5,5'-diphenylhydantoin Schiff bases before (SB) and after (SB(IRr)) UV illumination with  $\lambda = 350 \text{ nm}$  and scan rate  $100 \text{ mV s}^{-1}$

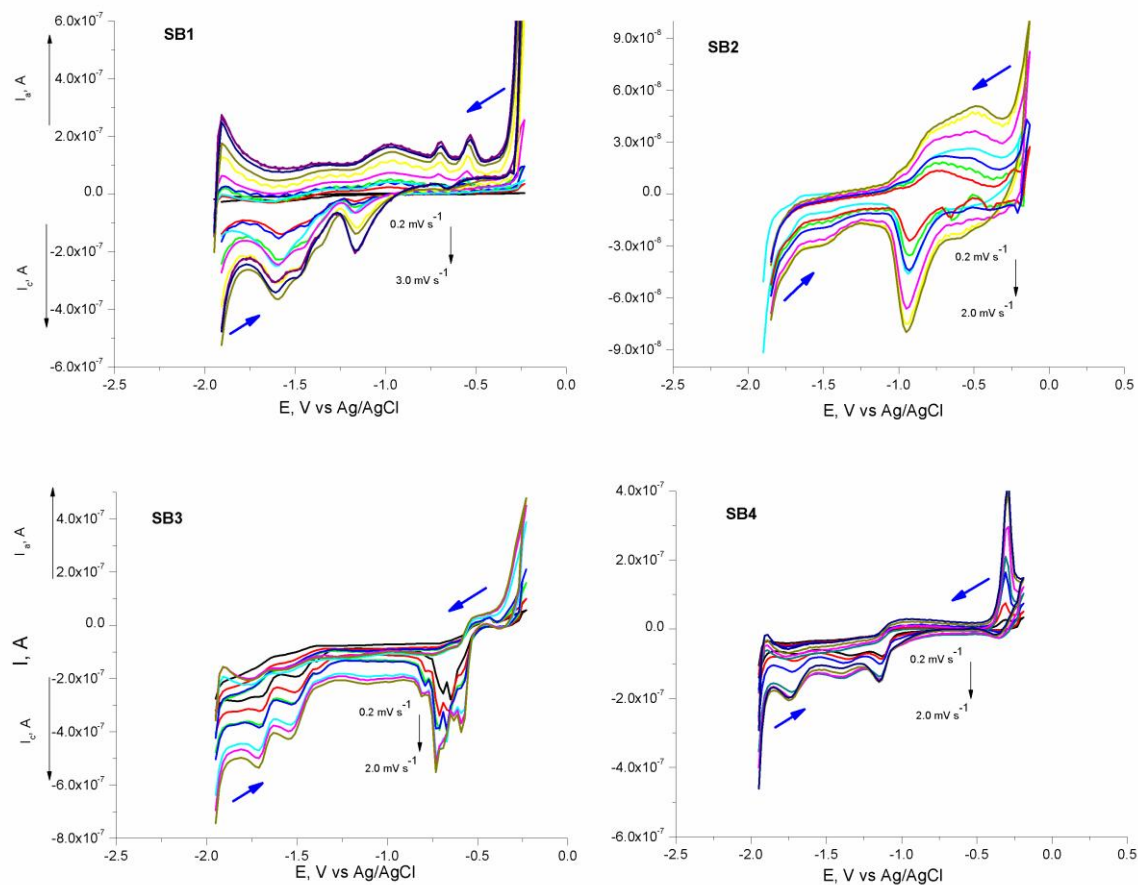

**Figure S13.** CVs of 3-amino-5,5'-diphenylhydantoin Schiff bases before UV illumination with  $\lambda = 350$  nm at concentrations: **SB1**:  $2.41 \times 10^{-4}$ ; **SB2**:  $3.16 \times 10^{-4}$ ; **SB3**:  $3.26 \times 10^{-4}$ ; **SB4**:  $1.41 \times 10^{-4}$  mol L<sup>-1</sup> and different scan rate (0.2, 0.4, 0.6, 0.8, 1.0, 1.2, 1.4, 1.6, 1.8, 2.0, 2.4, 2.8 and 3.0 cm s<sup>-1</sup>).

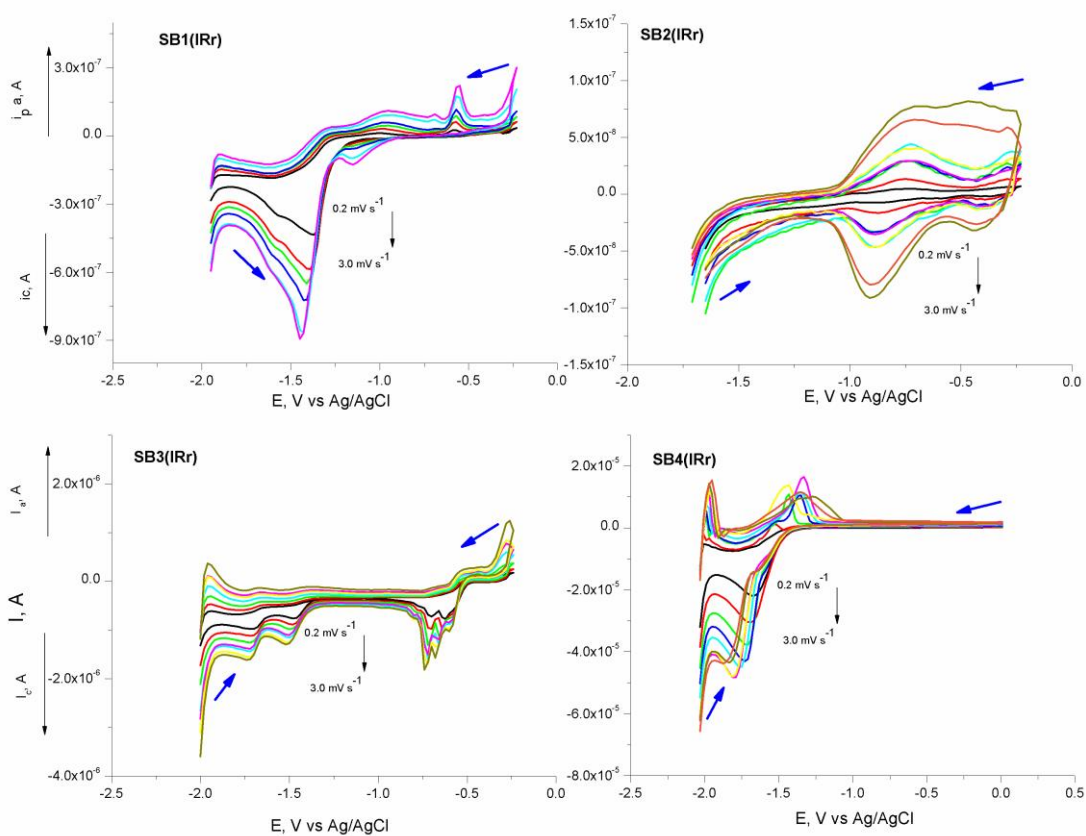

**Figure S14.** CVs of 3-amino-5,5'-diphenylhydantoin Schiff bases after UV illumination with  $\lambda = 350 \text{ nm}$  at concentrations: **SB1**:  $2.41 \times 10^{-4}$ ; **SB2**:  $3.16 \times 10^{-4}$ ; **SB3**:  $3.26 \times 10^{-4}$ ; **SB4**:  $1.41 \times 10^{-4} \text{ mol L}^{-1}$  and different scan rate (0.2, 0.4, 0.6, 0.8, 1.0, 1.2, 1.4, 1.6, 1.8, 2.0, 2.4, 2.8 and  $3.0 \text{ cm s}^{-1}$ ).

## X-ray Diffraction

**Table S1.** Bond Lengths (Å) for **SB2**, **SB3** and **SB4** and calculated differences ( $\Delta$ ) between the molecules (only bolded values show substantial deviations, all other are comparable to the esd)

|          | SB2      | $\Delta$ (SB2- SB3) | SB3      | $\Delta$ (SB3- SB4) | SB4      | $\Delta$ (SB2- SB4) |
|----------|----------|---------------------|----------|---------------------|----------|---------------------|
| O1 C1    | 1.209(4) | -0.002              | 1.211(2) | -0.002              | 1.213(2) | -0.004              |
| N3 N2    | 1.387(4) | 0.000               | 1.387(2) | 0.001               | 1.386(2) | 0.001               |
| N3 C10   | 1.273(5) | 0.005               | 1.268(2) | 0.005               | 1.263(2) | 0.010               |
| N2 C1    | 1.423(4) | 0.004               | 1.419(2) | -0.001              | 1.420(2) | 0.003               |
| N2 C2    | 1.380(5) | 0.006               | 1.374(2) | -0.011              | 1.385(2) | -0.005              |
| N1 C1    | 1.330(5) | -0.007              | 1.337(2) | -0.004              | 1.341(2) | <b>-0.011</b>       |
| N1 C3    | 1.459(4) | -0.001              | 1.460(2) | -0.001              | 1.461(2) | -0.002              |
| O2 C2    | 1.214(4) | 0.003               | 1.211(2) | 0.010               | 1.201(2) | 0.013               |
| O16 C16  | 1.359(5) | -                   | -        | -                   | -        | -                   |
| C4A C3   | 1.537(5) | 0.002               | 1.535(2) | 0.006               | 1.529(3) | 0.008               |
| C4A C9A  | 1.382(5) | -0.002              | 1.384(3) | 0.002               | 1.382(3) | 0.000               |
| C4A C5A  | 1.396(5) | 0.008               | 1.388(3) | <b>0.014</b>        | 1.374(3) | 0.022               |
| C2 C3    | 1.538(5) | 0.008               | 1.530(2) | -0.005              | 1.535(3) | 0.003               |
| C4 C3    | 1.515(5) | <b>-0.022</b>       | 1.537(2) | 0.010               | 1.527(3) | <b>-0.012</b>       |
| C4 C5    | 1.386(5) | -0.001              | 1.387(3) | 0.011               | 1.376(3) | 0.010               |
| C4 C9    | 1.376(5) | -0.003              | 1.379(2) | 0.000               | 1.379(3) | -0.003              |
| C10 C11  | 1.444(5) | <b>-0.018</b>       | 1.462(3) | -0.008              | 1.470(3) | -0.026              |
| C11 C16  | 1.389(6) | -0.001              | 1.390(3) | -                   | -        | -                   |
| C11 C12  | 1.394(6) | 0.007               | 1.387(3) | 0.008               | 1.379(3) | 0.015               |
| C5 C6    | 1.387(6) | <b>0.011</b>        | 1.376(3) | <b>-0.010</b>       | 1.386(3) | 0.001               |
| C9 C8    | 1.379(5) | -0.002              | 1.381(3) | -0.003              | 1.384(3) | -0.005              |
| C16 C15  | 1.386(6) | 0.007               | 1.379(3) | -                   | -        | -                   |
| C8 C7    | 1.365(5) | -0.002              | 1.367(3) | 0.002               | 1.365(3) | 0.000               |
| C7 C6    | 1.364(6) | -0.013              | 1.377(3) | <b>0.015</b>        | 1.362(4) | 0.002               |
| C9A C8A  | 1.375(6) | -0.010              | 1.385(3) | 0.004               | 1.381(4) | -0.006              |
| C5A C6A  | 1.367(6) | <b>-0.014</b>       | 1.381(3) | -0.007              | 1.388(4) | <b>-0.021</b>       |
| C12 C13  | 1.370(6) | -0.002              | 1.372(3) | -0.008              | 1.380(3) | -0.010              |
| C13 C14  | 1.352(6) | <b>-0.027</b>       | 1.379(3) | <b>0.015</b>        | 1.364(3) | -0.012              |
| C8A C7A  | 1.376(7) | 0.007               | 1.369(3) | 0.004               | 1.365(5) | <b>0.011</b>        |
| C15 C14  | 1.366(6) | -0.004              | 1.370(3) | 0.008               | 1.362(3) | 0.004               |
| C6A C7A  | 1.365(6) | -0.005              | 1.370(3) | <b>0.015</b>        | 1.355(5) | 0.010               |
| N14 C14  | -        | -                   | 1.469(3) | -                   | -        | -                   |
| N14 O14A | -        | -                   | 1.221(2) | -                   | -        | -                   |
| N14 O14B | -        | -                   | 1.224(3) | -                   | -        | -                   |
| N4 C11   | -        | -                   | -        | -                   | 1.338(2) | -                   |
| N4 C15   | -        | -                   | -        | -                   | 1.337(2) | -                   |
